# Supplementary material for: Validation of parsimonious prognostic models for patients infected with COVID-19
Source: PubMed Central journal article supplement — BMJ Health Care Inform. 2021 Sep 3;28(1):e100267. doi: 10.1136/bmjhci-2020-100267 (PMC8421114; doi:10.1136/bmjhci-2020-100267), 2021-09-03
Supplement: bmjhci-2020-100267supp001.pdf [file bmjhci-2020-100267supp001.pdf]

## Supplement:

### Explanation of Abbreviations

ALT: alanine aminotransferase  
 ARDS: acute respiratory distress syndrome  
 BP: blood pressure  
 BUN: blood urea nitrogen  
 CRP: C-reactive protein  
 ECMO: extracorporeal membrane oxygenation  
 eGFR: effective glomerular flow rate  
 FiO<sub>2</sub>: fraction of inspired oxygen  
 GCS: Glasgow coma score  
 ICU: intensive care unit  
 LDH: lactate dehydrogenase  
 PaO<sub>2</sub>: partial pressure of oxygen  
 RDW: erythrocyte distribution width  
 SPO<sub>2</sub>: oxygen saturation

### Supplementary Table A: Search Terms Utilized To Identify Prognostic Models.

|   | Terms Used                                                                                                            |
|---|-----------------------------------------------------------------------------------------------------------------------|
| 1 | COVID-19 & predict & (clinical    severe    survival    mortality    outcome    deterioration    risk    progression) |
| 2 | COVID-19 & patient & (model    score    nomogram    tool    index)                                                    |

### Supplementary Table B: Reported Model Performances in Training and Validation for Each Study.

| Author                | Study Training Performance | Study Validation Performance                   |
|-----------------------|----------------------------|------------------------------------------------|
| Jiao Gong et al.[7]   | AUROC = .91                | Cohort 1: AUROC = .85<br>Cohort 2: AUROC = .75 |
| Ying Zhou et al.[8]   | AUROC = .89                | AUROC = .88                                    |
| Handong Zou et al.[9] | AUROC = .88                |                                                |

|                         |                    |                    |
|-------------------------|--------------------|--------------------|
| Jianfeng Xie et al.[5]  | AUROC = .88        | AUROC = .98        |
| Li Yan et al.[6]        | AUROC = .95        | Avg F1 = .97       |
| Todd J. Levy et al.[10] | AUROC = .83        | Cross Validation   |
| Huayu Zhang et al.[12]  | Task 1 AUROC = .91 | Task 1 AUROC = .74 |
|                         | Task 2 AUROC = .88 | Task 2 AUROC = .72 |
| Yabing Guo et al.[13]   | AUROC = .86        | AUROC = .78        |
| Chuanyu Hu et al.[14]   | AUROC = .90        | AUROC = .88        |
| Ewan Carr et al.[11]    | AUROC = .75        | AUROC = .73        |

## Supplementary Table C: Summary of Cohort Profiles

| Author              | Cohort                        | Age (years)        | Female Sex (%) | Met Outcome (%)              | Location of Population |
|---------------------|-------------------------------|--------------------|----------------|------------------------------|------------------------|
| Jiao Gong et al.    | Training                      | 49 <sup>^</sup>    | 53             | 15                           | Guangdong, China       |
| Jiao Gong et al.    | External Test 1               | 52 <sup>^</sup>    | 56             | 24                           | Wuhan, China           |
| Jiao Gong et al.    | External Test 2               | 41.5 <sup>^</sup>  | 50             | 22                           | Guangdong, China       |
| Ying Zhou et al.    | Training and Testing          | 55.6 <sup>#</sup>  | 52.8           | 42.2                         | Wuhan, China           |
| Handong Zou et al.  | Training and Testing          | 57 <sup>#</sup>    | 51             | not stated                   | Wuhan, China           |
| Jianfeng Xie et al. | Training                      | 62.7 <sup>#</sup>  | 51.8           | 51.8                         | Wuhan, China           |
| Jianfeng Xie et al. | External Test                 | 56.5 <sup>#</sup>  | 0.3            | 47.6                         | Wuhan, China           |
| Li Yan et al.       | Training and Testing          | 58.8 <sup>#</sup>  | 40.3           | 46.4                         | Wuhan, China           |
| Todd J. Levy et al. | Training and Cross-Validation | 61-80 <sup>^</sup> | 41.6           | 22.6                         | New York, USA          |
| Huayu Zhang et al.  | Training                      | 61 <sup>#</sup>    | 51.1           | 4.3 (task 1), 9.7 (task 2)   | Wuhan, China           |
| Huayu Zhang et al.  | External Test                 | 74 <sup>#</sup>    | 45.1           | 34.1 (task 1), 42.9 (task 2) | London, UK             |
| Yabing Guo et al.   | Training                      | 42 <sup>#</sup>    | 51.6           | 7.9                          | Guangdong, China       |
| Yabing Guo et al.   | External Test                 | 56 <sup>#</sup>    | 50             | 12.1                         | Hubei, China           |
| Chuanyu Hu et al.   | Training                      | 63.5 <sup>#</sup>  | 0.4            | 37.2                         | Wuhan, China           |
| Chuanyu Hu et al.   | External Test                 | not stated         | not stated     | 48.4                         | Wuhan, China           |
| Ewan Carr et al.    | Training                      | 67 <sup>#</sup>    | 45.1           | 35.2                         | London, UK             |
| Ewan Carr et al.    | External Test                 | 67.9 <sup>#</sup>  | 46.5           | 23                           | London, UK             |

|                |                   |      |                              |               |
|----------------|-------------------|------|------------------------------|---------------|
| NYU Validation | 61.4 <sup>#</sup> | 42.2 | 21.0 (ICU), 22.8 (mortality) | New York, USA |
|----------------|-------------------|------|------------------------------|---------------|

<sup>^</sup> = Mean value

<sup>#</sup> = Median value
